# Supplementary material for: One-Pot Method of Synthesizing TEMPO-Oxidized Bacterial Cellulose Nanofibers Using Immobilized TEMPO for Skincare Applications
Source: MDPI journal article supplement (doi:10.3390/polym11061044), 2019-06-14
Supplement: s1 [file s1]

Supporting information

# **One-Pot Method of Synthesizing TEMPO-Oxidized Bacterial Cellulose Nanofibers Using Immobilized TEMPO for Skincare Applications**

Seung-Hyun Jun <sup>1</sup>, Sun-Gyoo Park <sup>1</sup> and Nae-Gyu Kang <sup>1,\*</sup>

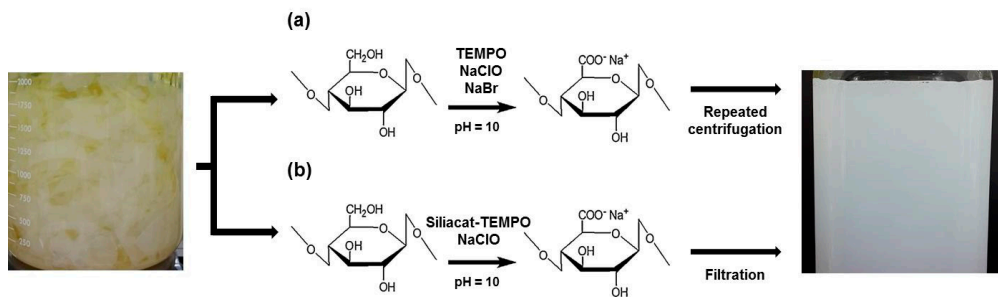

**Figure S1.** Schematic showing the synthesis of TOCNs via the (a) conventional process and (b) the one-pot process.

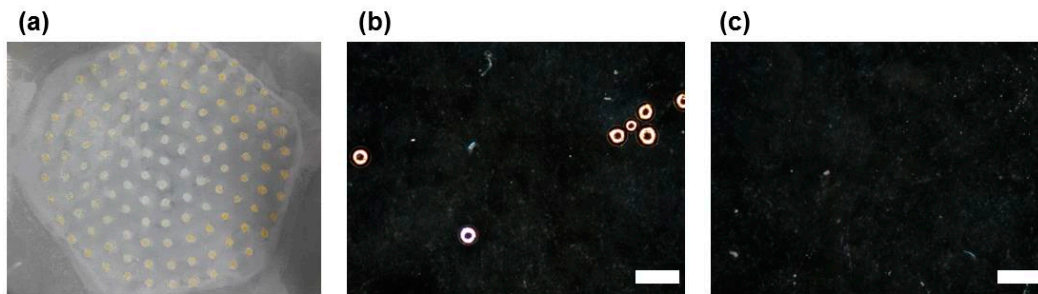

**Figure S2.** (a) Filtrated TEMPO-immobilized silica beads on the nylon mesh after the oxidation reaction, and the immobilized TEMPO, sodium hypochlorite, and BC solution (b) before and (c) after filtration. Scale bar = 300  $\mu\text{m}$ .

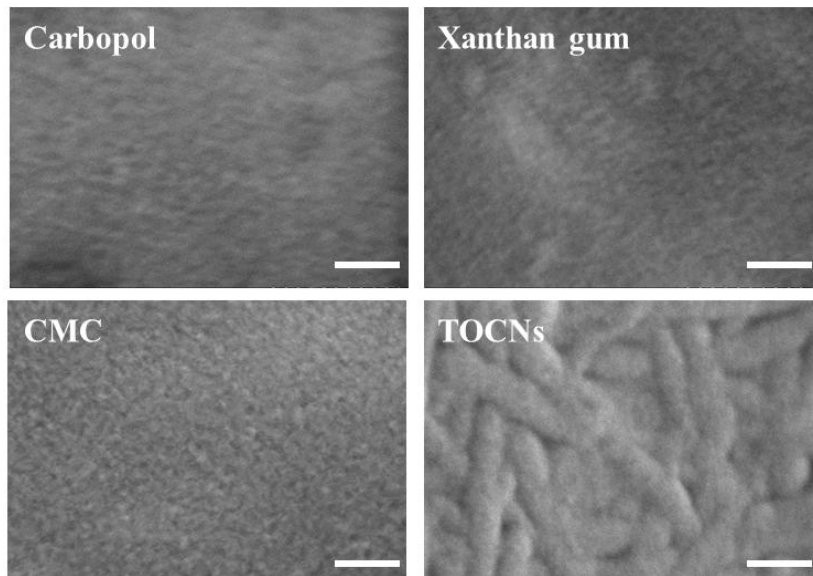

**Figure S3.** Nanometer-resolution structures of the TOCNs and other bio-polymers obtained via high-resolution imaging using a FE-SEM. Scale bar = 100 nm.
